# Supplementary material for: A highly sensitive and selective fluorescent probe for hypochlorite in pure water with aggregation induced emission characteristics
Source: Royal Society of Chemistry journal article supplement (doi:10.1039/c6fd00168h), 2016-07-28
Supplement: c6fd00168h1.pdf [file c6fd00168h1.pdf]

Electronic Supplementary Information

**A Highly Sensitive and Selective Fluorescent Probe for Hypochlorite in Pure Water with  
Aggregation Induced Emission Characteristics**

Can Wang, Hongyu Ji, Mengshu Li, Likun Cai, Zhipeng Wang, Qianqian Li and Zhen Li\*<sup>a</sup>

<sup>a</sup> *Department of Chemistry, Wuhan University, Wuhan 430072, China*

\* Corresponding authors: Prof. Zhen Li: lizhen@whu.edu.cn or lichemlab@163.com;

**Table of Contents**

- 1 Scheme S1.** Synthetic route for TPE2B, TPE2OH, TPEB and TPEOH.
- 2 Figure S1.** Fluorescence stability of TPE2B (black) and the fluorescence kinetic response to OCl<sup>-</sup>.
- 3 Figure S2.** Fluorescence responses of TPE2B to OCl<sup>-</sup> in the presence of other species.
- 4 Figure S3.** Fluorescence changes of TPE2B by mixing TPE2B (0.1 mL, 1 mM) with 9.9 mL different concentrations of NaClO and the plot of fluorescence intensity versus OCl<sup>-</sup> concentration (0-10 μM).
- 5 Figure S4.** HPLC spectra of TPE2B, TPE2B incubated with NaClO and TPE2OH.
- 6 Figure S5.** <sup>1</sup>H NMR spectra of TPEB, TPEOH and the product from the reaction of TPEB with NaClO.
- 7 Figure S6.** IR spectra of TPEB, TPEOH and the product from the reaction of TPEB with NaClO.

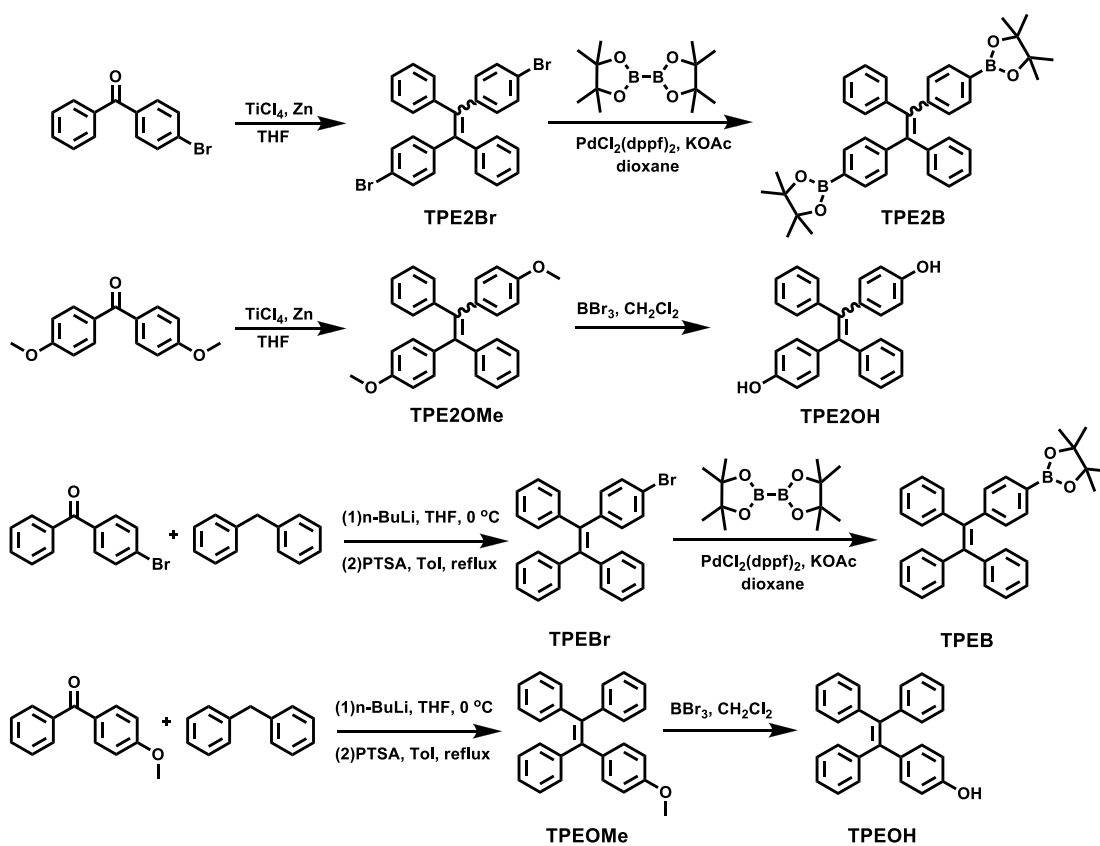

**Scheme S1.** Synthetic route for TPE2B, TPE2OH, TPEB and TPEOH.

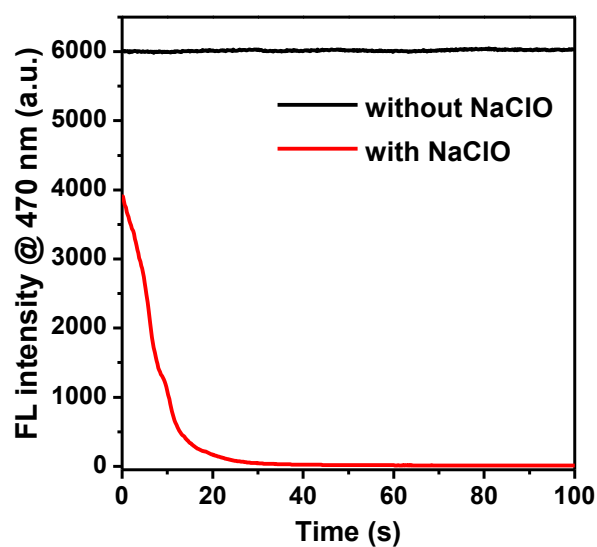

**Figure S1.** Fluorescence stability of TPE2B (black) and the fluorescence kinetic response to OCl<sup>-</sup> (red) after the addition of NaClO in 100s (ex 323 nm, em 470 nm).

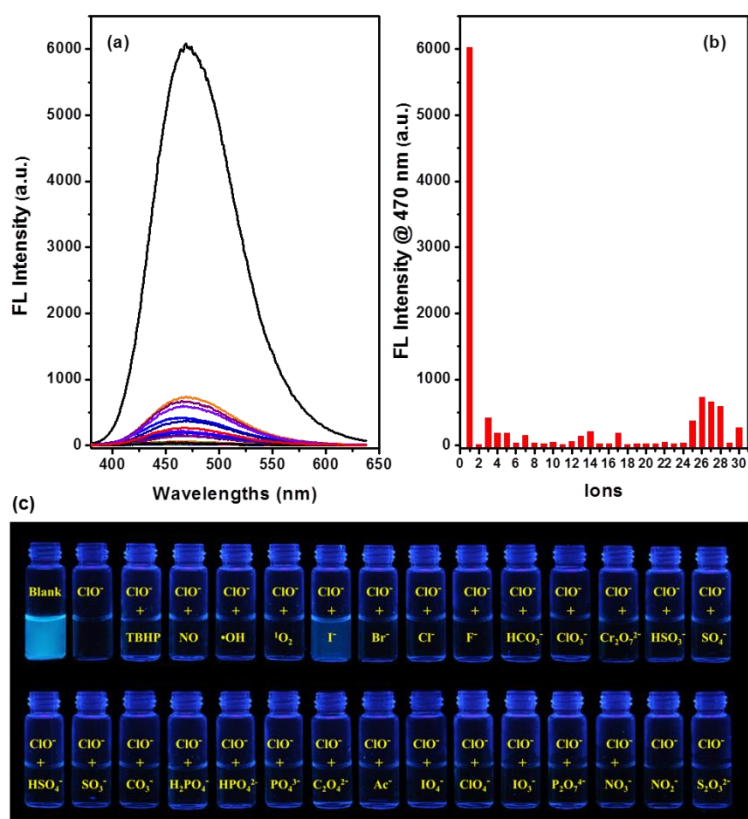

**Fig S2** (a) Fluorescence spectra of TPE2B with 50.0  $\mu\text{M}$  different species upon addition of 50.0  $\mu\text{M}$  hypochlorite in an aqueous solution (containing 1% THF). (b) Fluorescence intensity changes of TPE2B with 50.0  $\mu\text{M}$  different species upon addition of 50.0  $\mu\text{M}$  hypochlorite at 470nm. Concentration: 10  $\mu\text{M}$ . (c) The emission photos of TPE2B with 50.0  $\mu\text{M}$  different species under 365 nm UV illumination.

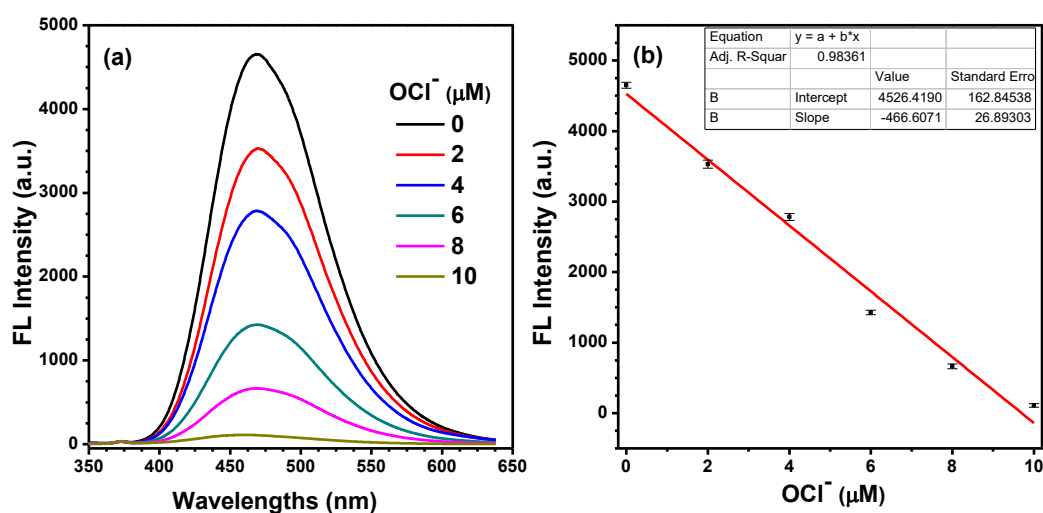

**Figure S3.** (a) Fluorescence changes of TPE2B by mixing TPE2B (0.1 mL, 1 mM) with 9.9 mL different concentrations of NaClO. The concentration of OCl<sup>-</sup> was 0, 2.0, 4.0, 6.0, 8.0, and 10.0  $\mu\text{M}$ . (b) Plot of fluorescence intensity versus OCl<sup>-</sup> concentration (0-10  $\mu\text{M}$ ).

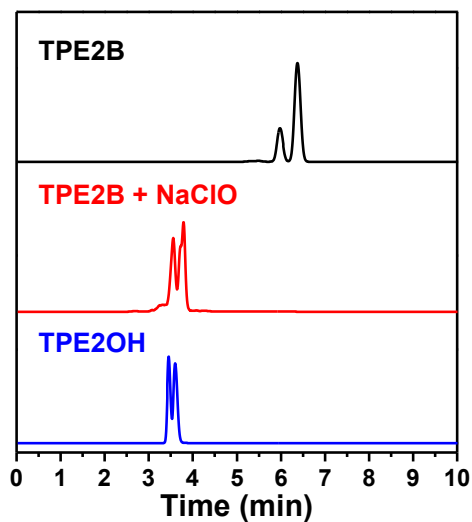

**Figure S4** HPLC spectra of TPE2B, TPE2B incubated with NaClO and TPE2OH. The mobile phase is methanol.

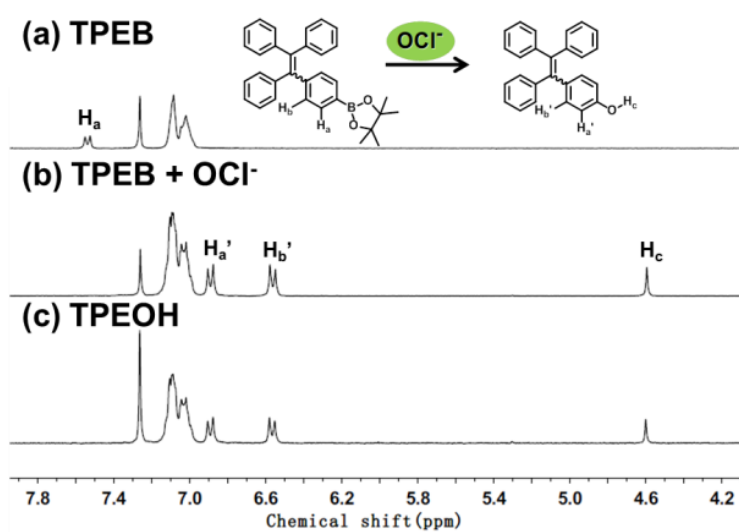

**Figure S5** (a) <sup>1</sup>H NMR spectra of TPEB. (b) <sup>1</sup>H NMR spectra of the product after the reaction of TPEB with NaClO. (c) <sup>1</sup>H NMR spectra of TPEOH. Solvent: CDCl<sub>3</sub>.

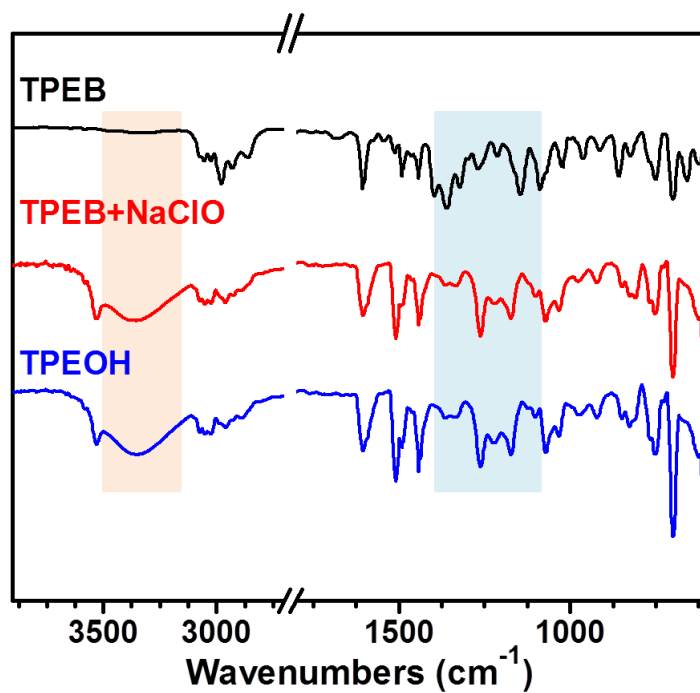

**Figure S6.** IR spectra of TPEB (black line), the product separated from TPEB under addition of 5 equiv. NaClO (red line) and TPEOH prepared by synthesis (blue line).
